# Supplementary material for: The role of electronegativity in the thermoelectric performance of GeTe–I–V–VI2 solid solutions
Source: Royal Society of Chemistry journal article supplement (doi:10.1039/d0ta10268g), 2020-12-16
Supplement: d0ta10268g1.pdf [file d0ta10268g1.pdf]

## Supporting Information

### The role of electronegativity on the thermoelectric performance of GeTe - I-V-VI<sub>2</sub> solid solutions

Nanhai Li<sup>a, b</sup>, Wenlu He<sup>a</sup>, Chengjun Li<sup>a</sup>, Guiwen Wang<sup>c</sup>, Guoyu Wang<sup>\*b</sup>, Xiaoyuan Zhou<sup>\*a, c</sup> and Xu Lu<sup>\*a</sup>

<sup>a</sup>Chongqing Key Laboratory of Soft Condensed Matter Physics and Smart Materials, College of Physics, Chongqing University, Chongqing 401331, P. R. China

<sup>b</sup>Chongqing Institute of Green and Intelligent Technology, Chinese Academy of Sciences, Chongqing 400714, P. R. China

<sup>c</sup>Analytical and Testing Center, Chongqing University, Chongqing 401331, P. R. China

Contact Authors: luxu@cqu.edu.cn; guoyuw@cigit.ac.cn; [xiaoyuan2013@cqu.edu.cn](mailto:xiaoyuan2013@cqu.edu.cn)

#### 1. Single parabolic band (SPB) model

The following equations are used to estimate the effective mass<sup>1</sup>:

$$s = -\frac{k_B}{e} \left( \frac{\left(\frac{5}{2} + \lambda\right) F_{\frac{3}{2} + \lambda}(\eta)}{\left(\frac{3}{2} + \lambda\right) F_{\frac{1}{2} + \lambda}(\eta)} - \eta \right) \quad (1)$$

$$n_H = -\frac{4\pi(2m_d^*k_B T)^{\frac{3}{2}} F_1(\eta)}{h^3 r_H} \quad (2)$$

$$r_H = \frac{3}{2} \frac{F_1(\eta)}{F_{\frac{1}{2} + 2\lambda}(\eta)} \frac{\left(\frac{3}{2} + 2\lambda\right) F_{\frac{1}{2} + 2\lambda}(\eta)}{\left(\frac{3}{2} + \lambda\right)^2 F_{\frac{1}{2} + \lambda}(\eta)^2} \quad (3)$$

$$F_i(\eta) = \int_0^\infty \frac{x^i}{1 + \exp(x - \eta)} dx \quad (4)$$

where  $\eta = E_F/k_B T$  is the reduced Fermi level,  $x$  is the reduced carrier energy,  $F_i(\eta)$  is the Fermi-Dirac integral,  $r_H$  is the Hall factor,  $m_d^*$  is the density of states (DOS) effective mass,  $h$  is the Planck constant, and  $\lambda$  is the scattering factor which depends on the energy dependence of the carrier relaxation time  $\tau$  via  $\tau = \tau_0 \xi^\lambda$ . When the acoustic phonon scattering or alloy scattering is dominant,  $\lambda = -1/2$ .

## 2. B factor & $zT$

$\beta$  is defined by the relation<sup>2</sup>:

$$\beta = \left(\frac{\kappa}{e}\right)^2 \frac{\sigma_{E0} T}{\lambda_L} \quad (5)$$

where  $\kappa$  is the Boltzmann constant,  $\lambda_L$  is the lattice thermal conductivity,  $\sigma_0$  is a quantity termed as transport coefficient that depends on the carrier mobility and the effective mass according to:

$$\sigma_{E0} = 2e\mu \left(\frac{2\pi m_d^*}{h^2}\right)^{3/2} \quad (6)$$

where  $\mu$  is the carrier mobility,  $m_d^*$  is the density of states (DOS) effective mass,  $h$  is the Planck constant.

To see how the definition of  $\beta$  is justified, we can now separate the  $\eta$ -dependent terms from  $zT$ <sup>3</sup>:

$$\begin{aligned} zT &= \frac{S^2 \sigma T}{\lambda_L + \lambda_e} = \frac{S^2}{\lambda_L / \sigma T + L} \\ &= \frac{S^2(\eta)}{\frac{\lambda_L}{T \sigma_{E0} \cdot \ln(1 + e^\eta)} + L(\eta)} \end{aligned}$$

$$= \frac{S^2(\eta)}{\frac{(\kappa_B/e)^2}{\beta \cdot \ln(1+e^\eta)} + L(\eta)}$$

where  $\beta$  combines all the  $\eta$ -independent material parameters, giving the definition of the dimensionless material quality factor in Eq.5. The natural unit of the Lorenz number  $(\kappa_B/e)^2$  was multiplied in the term containing  $1/\beta$  to make  $\beta$  dimensionless for convenience.

## References

1. X. Liu, T. Zhu, H. Wang, L. Hu, H. Xie, G. Jiang, G. J. Snyder and X. Zhao, *Advanced Energy Materials*, **2013**, 3, 1238-1244.
2. Goldsmid, H. J. *Thermoelectric Refrigeration* (Plenum, **1964**).
3. S. D. Kang and G. J. Snyder, *Nature Materials*, **2017**, 16, 252-257.

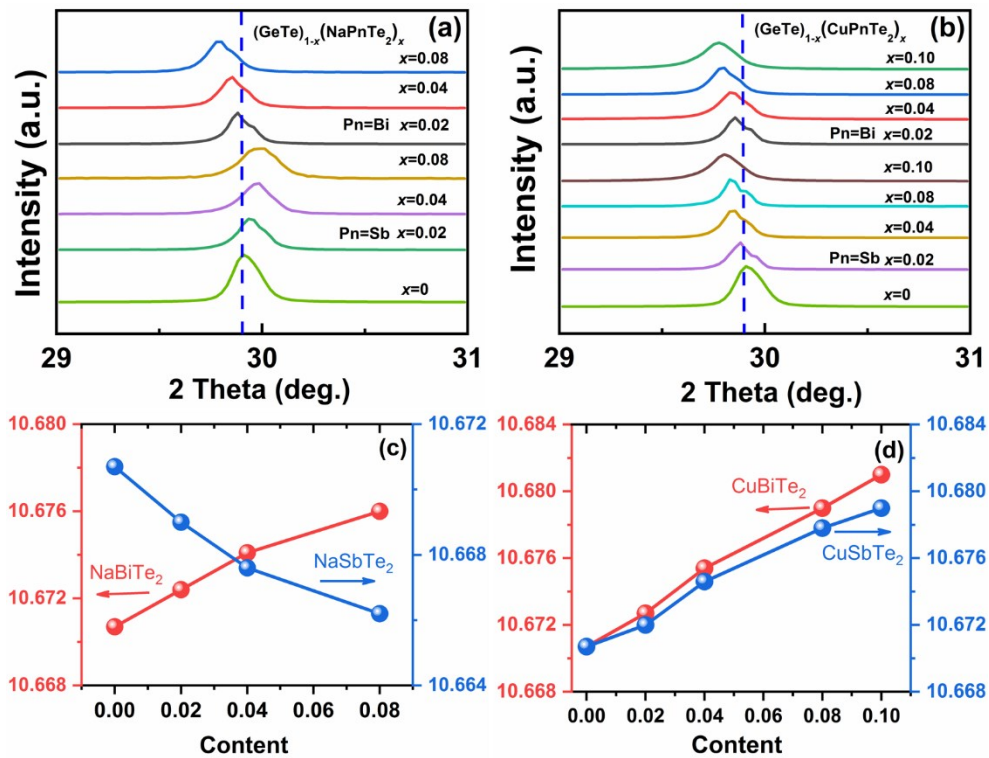

**Figure S1.** (a-b) The magnified area of the powder X-ray diffraction pattern of  $(\text{GeTe})_{1-x}(\text{NaPnTe}_2)_x$  and  $(\text{GeTe})_{1-x}(\text{CuPnTe}_2)_x$  in the angles  $(2\theta)$  from  $29^\circ$  to  $31^\circ$ . (c-d) The lattice constants (c-axis) of  $(\text{GeTe})_{1-x}(\text{NaPnTe}_2)_x$  and  $(\text{GeTe})_{1-x}(\text{CuPnTe}_2)_x$ .

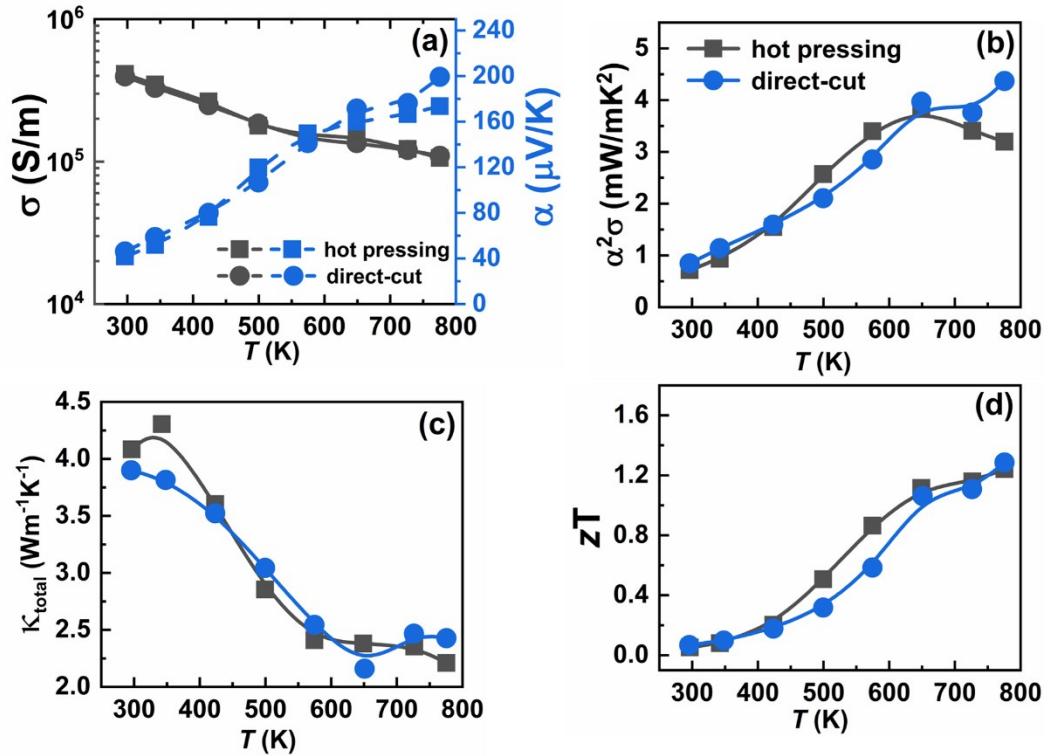

**Figure S2.** The comparison of the thermal and electrical performance data of  $(\text{GeTe})_{0.98}(\text{NaBiTe}_2)_{0.02}$  after hot pressing (powder was consolidated to a disk by a direct-current-induced hot pressing at about 873 K for 40 min and under the pressure of  $\sim 50$  MPa) and direct cutting.

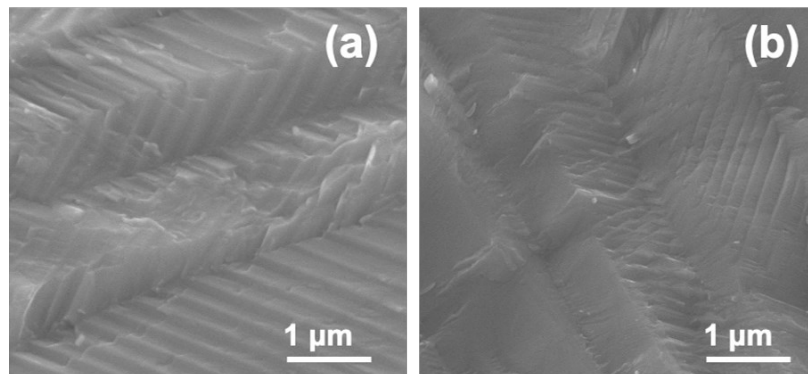

**Figure S3.** SEM image of fresh fracture surface morphology of  $(\text{GeTe})_{0.98}(\text{NaBiTe}_2)_{0.02}$  after (a) direct cutting and (b) hot pressing.
